# Supplementary material for: High performance organic light-emitting diodes employing ITO-free and flexible TiOx/Ag/Al:ZnO electrodes
Source: RSC Adv. 2021 May 12;11(28):17324–31. doi: 10.1039/d1ra02214h (PMC9033011; doi:10.1039/d1ra02214h)
Supplement: RA-011-D1RA02214H-s001 [file RA-011-D1RA02214H-s001.pdf]

## ELECTRONIC SUPPLEMENTARY INFORMATION

### High performance organic light-emitting diodes employing ITO-free and flexible TiOx/Ag/Al:ZnO electrodes

Lukas Kinner,<sup>a,b</sup> Theodoros Dimopoulos,<sup>\*b</sup> Giovanni Ligorio,<sup>a</sup> Emil J. W. List-Kratochvil<sup>a,c</sup> and Felix Hermerschmidt<sup>\*a</sup>

<sup>a</sup>Humboldt-Universität zu Berlin, Institut für Physik, Institut für Chemie, IRIS Adlershof, Brook-Taylor-Straße 6, 12489 Berlin, Germany. Email: felix.hermerschmidt@hu-berlin.de

<sup>b</sup>AIT Austrian Institute of Technology, Center for Energy, Photovoltaic Systems, Giefinggasse 6, 1210 Vienna, Austria.

<sup>c</sup>Helmholtz-Zentrum Berlin für Materialien und Energie GmbH, Hahn-Meitner-Platz 1, 14109 Berlin, Germany.

#### Device fabrication

The in-house sputtered transparent electrodes (TEs, Figure S1 (a)) were patterned by covering a 5 mm-wide strip in the middle of the sample (Figure S1 (b)) with polyimide tape (Kapton®) and using a cotton swab, immersed in 2 % HCl solution, to remove the TE from the non-covered part of the sample (Figure S1 (c)). The samples were rinsed with ultra-pure water and blown dry, before removing the polyimide strip (Figure S1 (d)). Subsequently, 10 nm Cr and 50 nm Au were thermally evaporated through a shadow mask to form 2 mm-wide contact fingers, with 4 fingers on each side of the central TE strip (Figure S1 (e)). The samples were then rinsed with ethanol and iso-2-propanol.

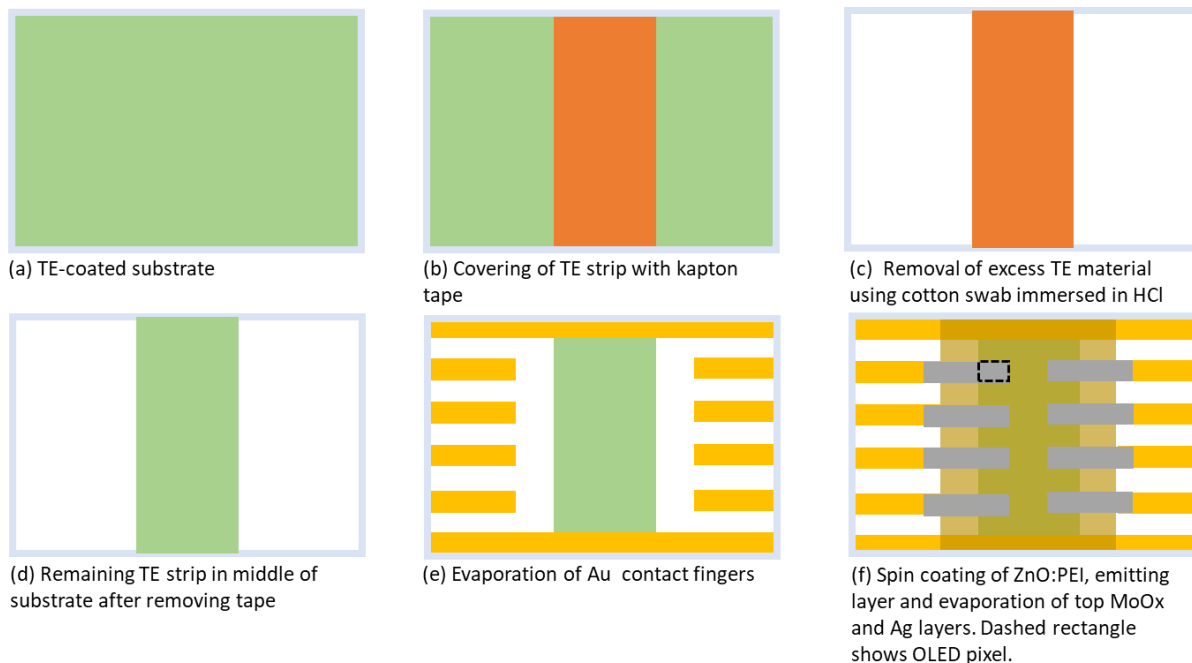

**Figure S1.** Steps for the TE patterning and fabrication of the OLED devices.

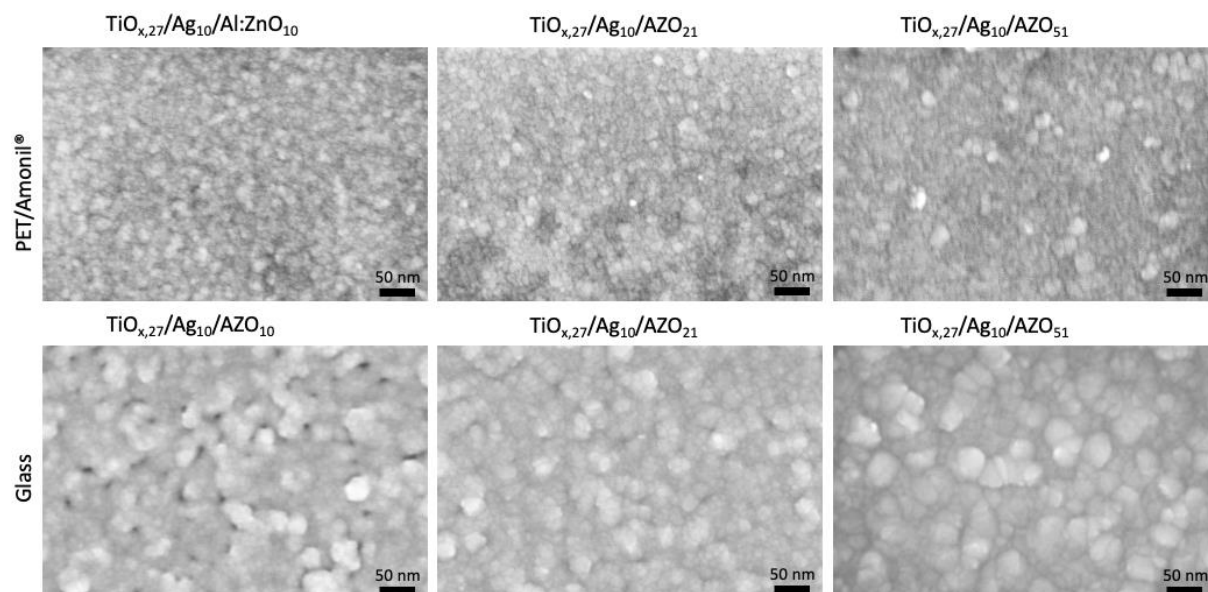

**Figure S2.** Surfaces of studied electrodes on PET and glass with different Al:ZnO thicknesses, showing a closed morphology of the Al:ZnO layer independent of Al:ZnO thickness.

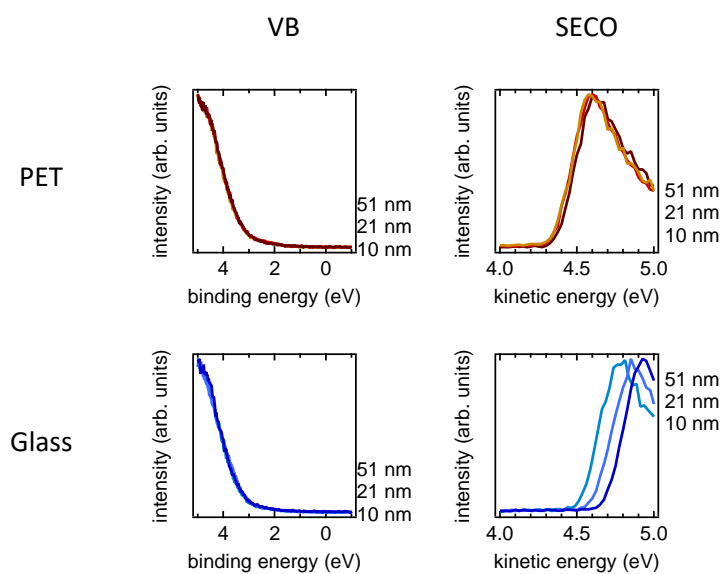

**Figure S3.** UPS measurements of DMD electrodes on glass and PET with different Al:ZnO thicknesses.

**Table S1.** The valence band (VB) onset are similar for both substrate types and all thicknesses, while the secondary electron cutoff (SECO) shows only little variation.

|       | PET     |           | Glass   |           |
|-------|---------|-----------|---------|-----------|
|       | VB (eV) | SECO (eV) | VB (eV) | SECO (eV) |
| 10 nm | 3.3     | 4.3       | 3.3     | 4.5       |
| 21 nm | 3.2     | 4.3       | 3.2     | 4.6       |
| 51 nm | 3.2     | 4.4       | 3.3     | 4.6       |

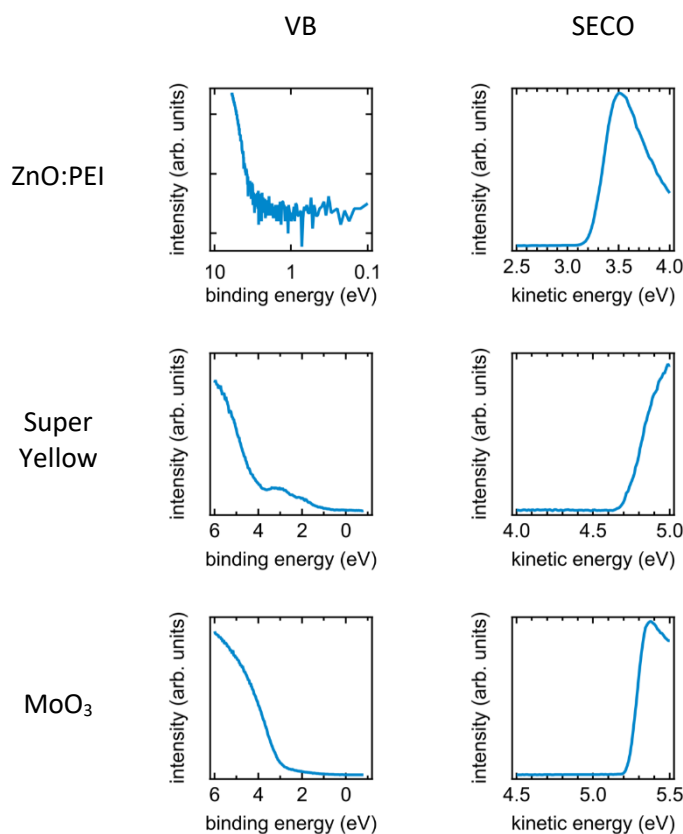

**Figure S4.** UPS measurements of the layers used in the OLED of this work. The valence band (VB) of the ZnO:PEI layer is shown in a logarithmic form to better visualize the onset.

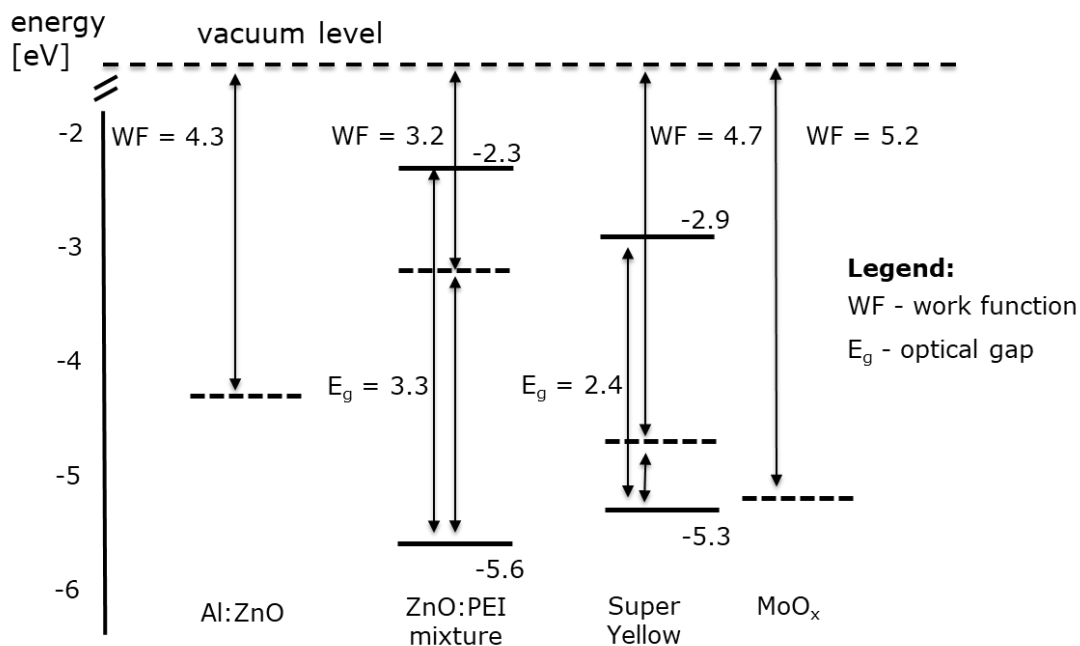

**Figure S5:** Thin film energy level diagram of studied devices, with work function (WF) determined by UPS (see also Figures S4 and S5) and optical gap (E<sub>g</sub>) determined by UV-vis absorption (data not shown). No Fermi level alignment was considered, and all energy levels were considered with vacuum level alignment.

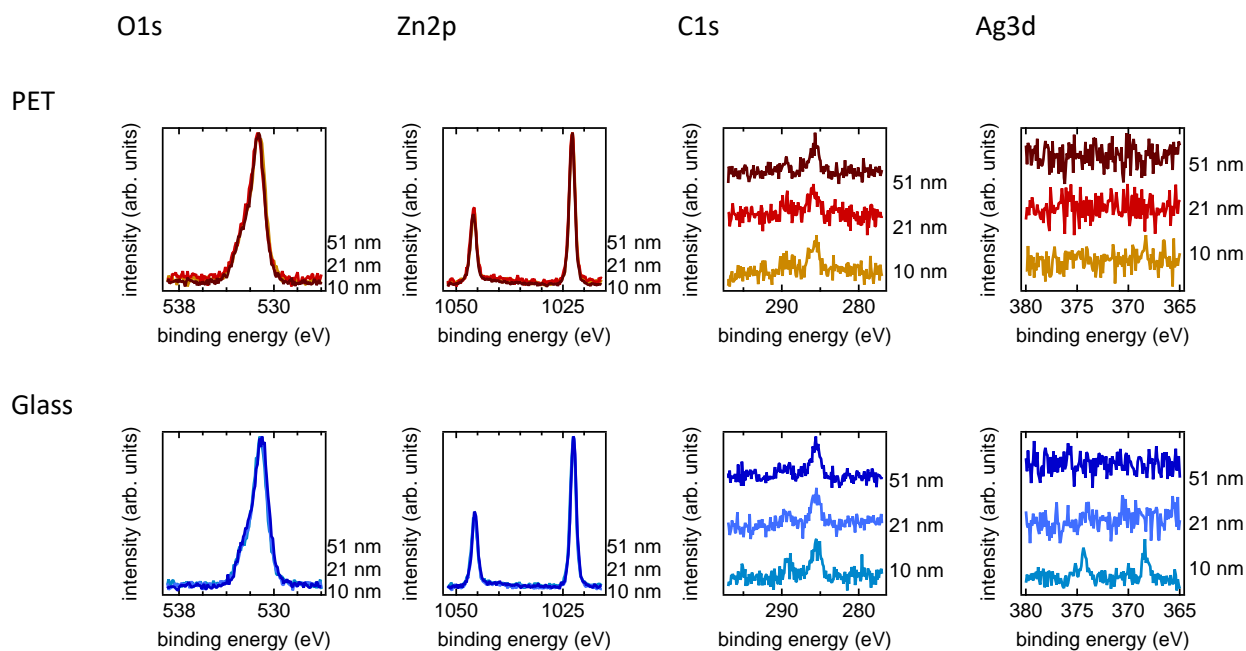

**Figure S6.** The XPS data reveals no significant differences between PET and glass based layers, with the exception of the 10 nm thick Al:ZnO layer on glass showing two peaks in the Ag 3d signal, indicating possible pinholes in the film.

**Table S2.** Similar oxygen and Zn ratios are seen across the three substrate thicknesses and two substrate types.

|       | PET   |        | Glass |        |
|-------|-------|--------|-------|--------|
|       | O (%) | Zn (%) | O (%) | Zn (%) |
| 10 nm | 65.1  | 24.9   | 65.6  | 34.4   |
| 21 nm | 64.1  | 35.9   | 65.0  | 35.0   |
| 51 nm | 63.9  | 36.1   | 66.7  | 33.3   |
